# Supplementary material
Source: PubMed Central journal article supplement (PMC4873425)
Supplement: NIHMS746254-supplement-1.pdf [file NIHMS746254-supplement-1.pdf]

## Supplementary Figures and Tables

### Contents:

Supplementary Figure 1a and 1b: Histogram of *unweighted* sum of risk alleles for case and controls across (1a) 23 new PCa variants and (1b) 63 total PCa variants.

Supplementary Figure 2a and 2b: Histogram of *weighted* sum of risk alleles for case and controls across (1a) 23 new PCa variants and (1b) 63 total PCa variants.

Supplementary Figure 3: Association results across decile categories for the *unweighted* sum of risk alleles across 23 new, 40 established and 63 total PCa variants.

Supplementary Figure 4: Association results between percentile-cutpoint-defined dichotomous categories for *unweighted* and *weighted* sum of risk alleles and PCa.

Supplementary Table 1: List of 40 established variants included in aggregate risk-allele testing.

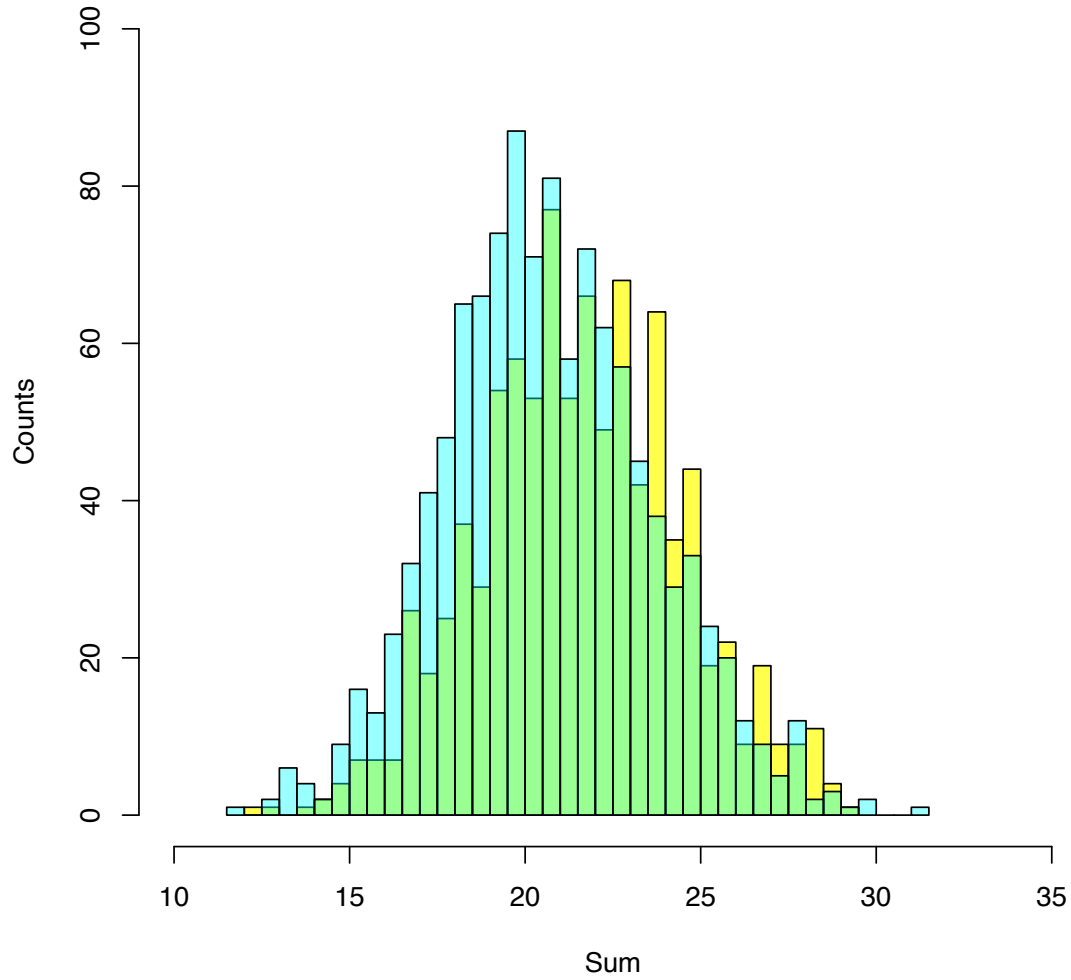

Supplementary Figure 1a. Histogram of *unweighted* total number of risk alleles for early-onset cases (n=931; yellow and green) and controls (n=1126; blue and green) for 23 new PCa variants identified in Eeles et al. (20). The green region represents the overlap of the distributions.

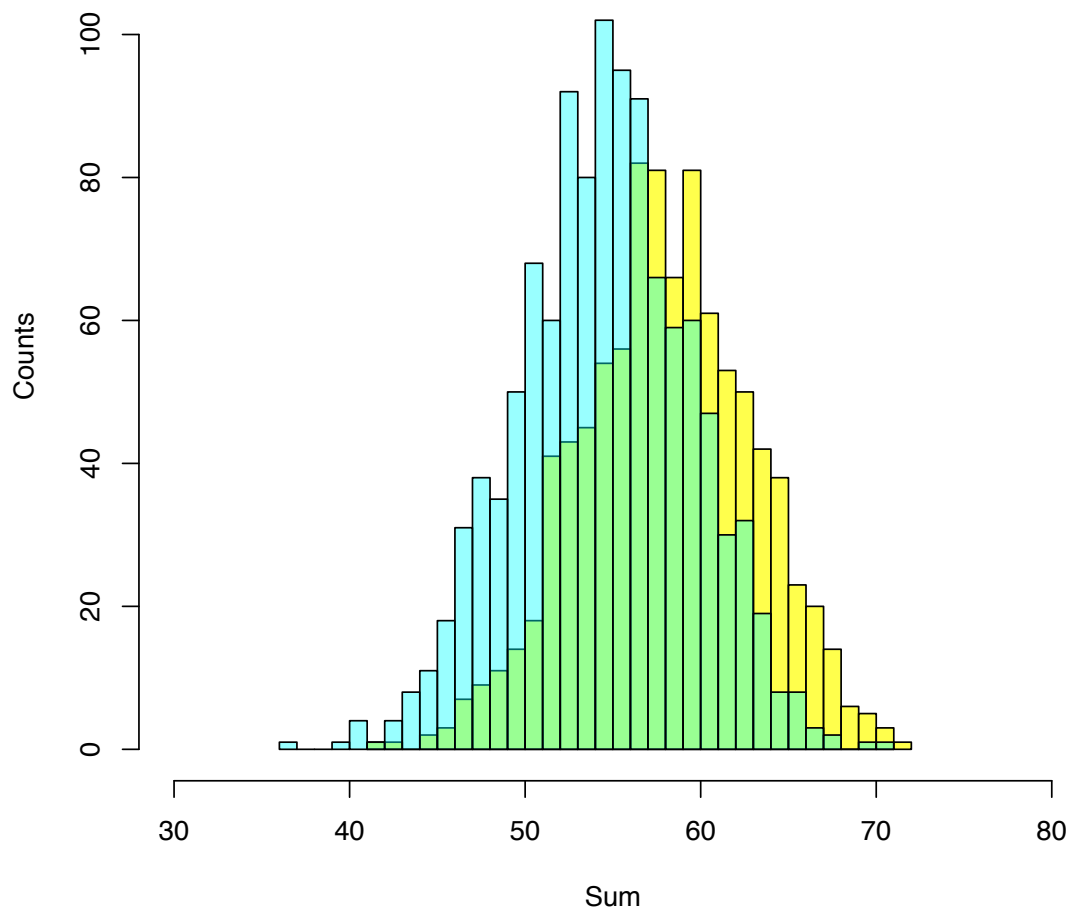

Supplementary Figure 1b. Histogram of *unweighted* total number of risk alleles for early-onset cases (n=931; yellow and green) and controls (n=1126; blue and green) for 63 combined new and established PCa variants in Eeles et al. (20). and Guo et al. (29). The green region represents the overlap of the distributions.

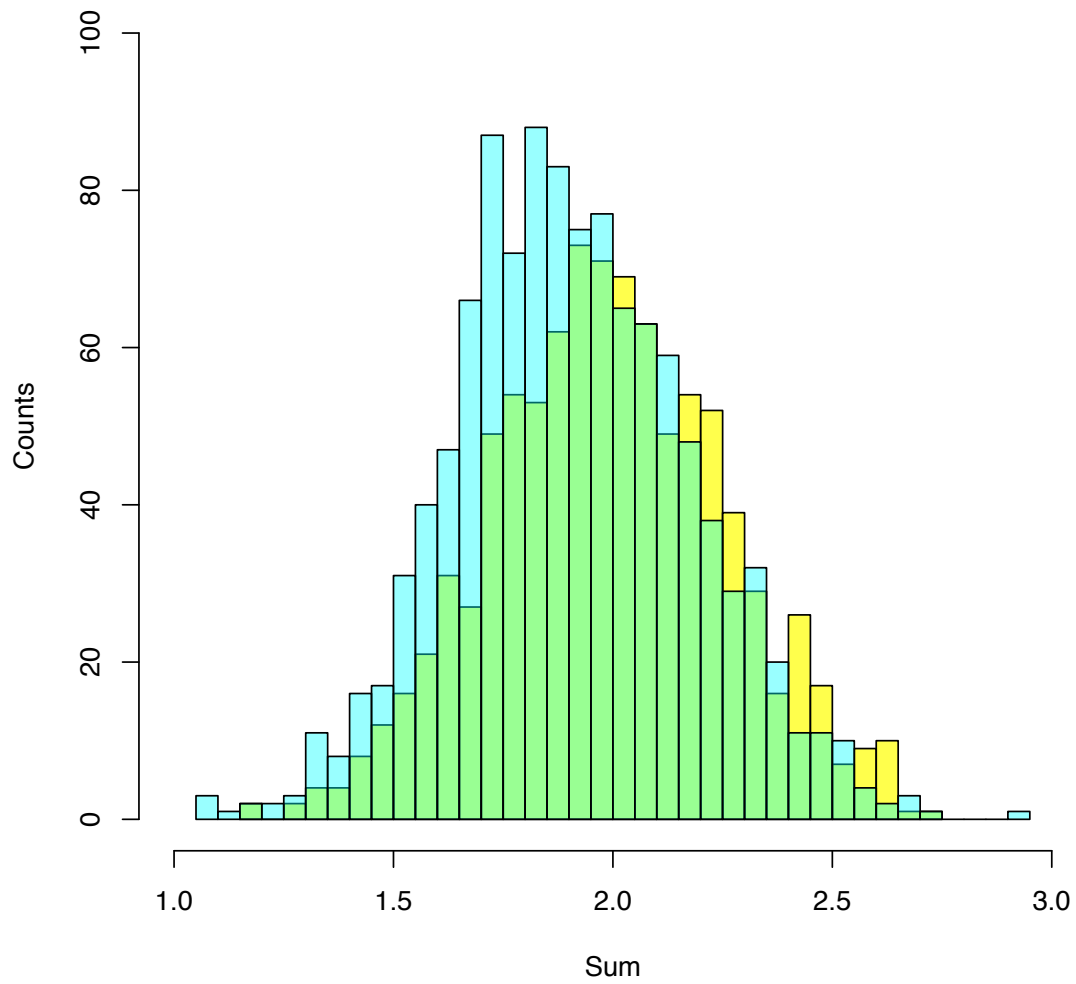

Supplementary Figure 2a. Histogram of *weighted* ( $\ln[OR]$ , OR from Eeles et al. (20) ) total number of risk alleles for early-onset cases ( $n=931$ ; yellow and green) and controls ( $n=1126$ ; blue and green) for 23 new PCa variants identified in Eeles et al. (20). The green region represents the overlap of the distributions.

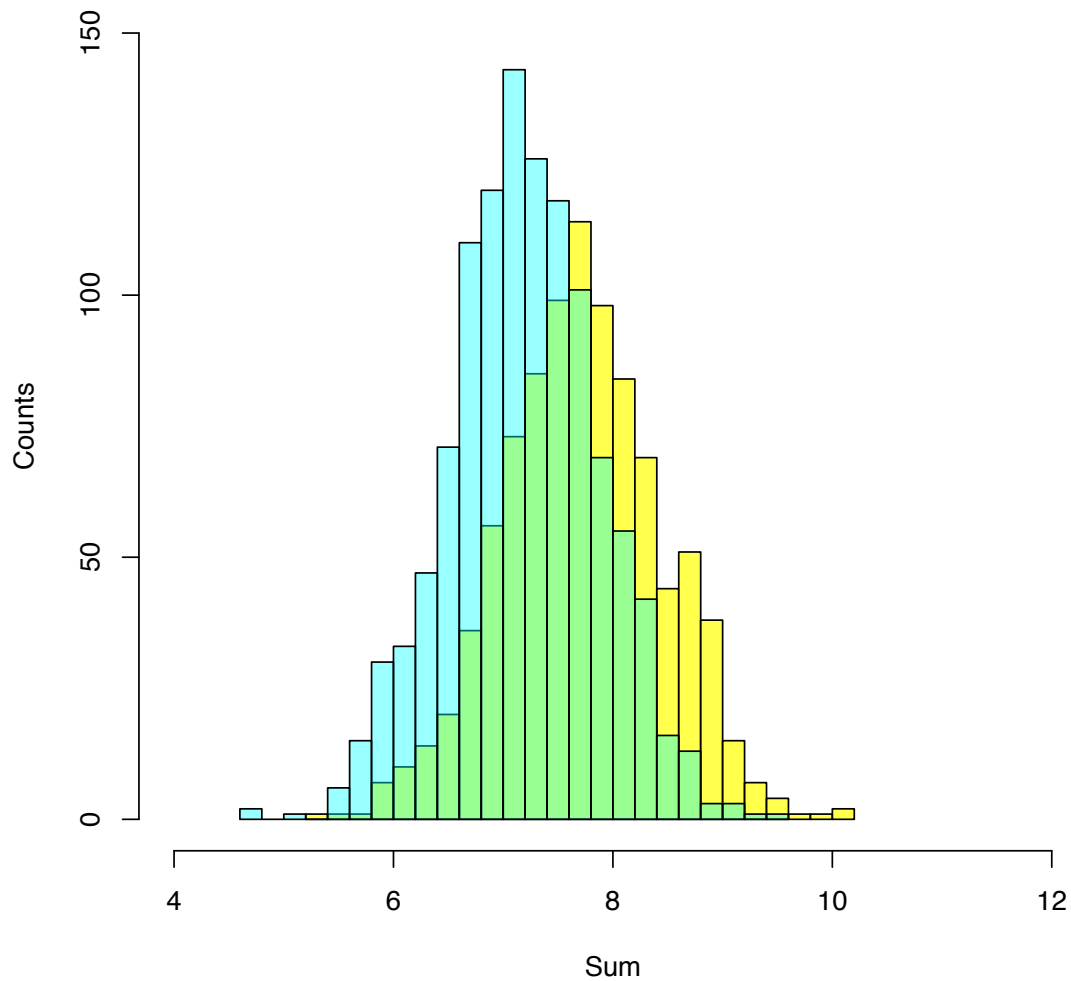

Supplementary Table 2b. Histogram of *weighted* (ln[OR], OR from Eeles et al. (20) and Guo et al. (29)) total number of risk alleles for early-onset cases (n=931; yellow and green) and controls (n=1126; blue and green) for 63 combined new and established PCa variants in Eeles et al. (20) and Guo et al. (29). The green region represents the overlap of the distributions.

Supplementary Figure 3. Association between decile categories (lowest decile group is reference category) for *unweighted* number of risk alleles carried and PCa. Decile-specific odds ratios were estimated based on the imputed dataset (931 cases and 1,126 controls) for (a) 23 newly reported PCa variants (b) 40 established PCa variants (c) 63 combined PCa variants.

(a)

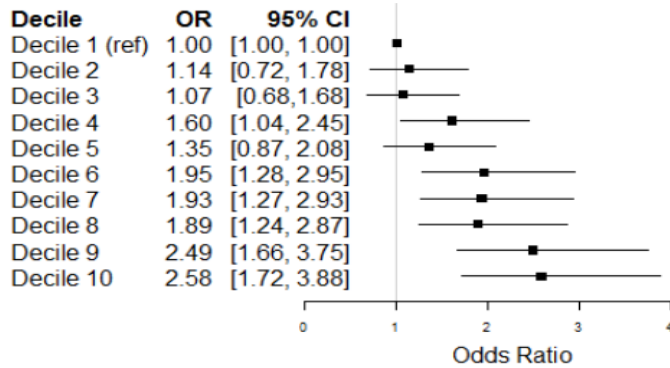

(b)

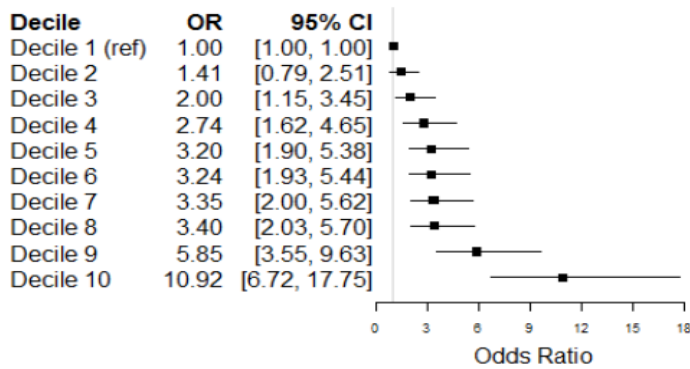

(c)

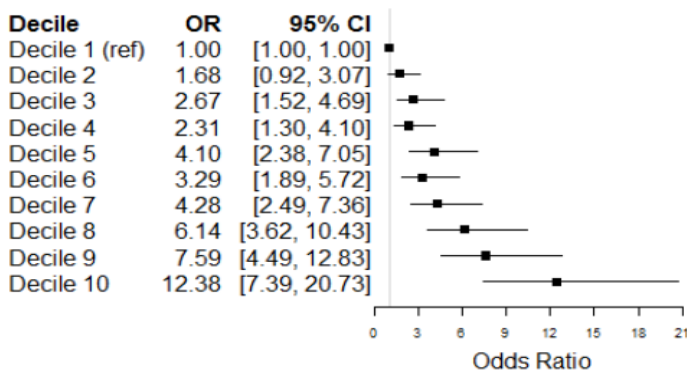

Supplementary Figure 4. Association results between percentile-cutpoint-defined dichotomous categories (lowest category group is reference category) for sum of risk alleles carried and PCa. Cutpoint-specific odds ratios were estimated based on the imputed dataset (931 cases and 1,126 controls) for (a) *unweighted* 23 newly reported PCa variants, (b) *weighted* 23 newly reported PCa variants, (c) *unweighted* 40 established PCa variants, (d) *weighted* 40 established PCa variants (e) *unweighted* 63 combined PCa variants, (f) *weighted* 63 combined PCa variants.

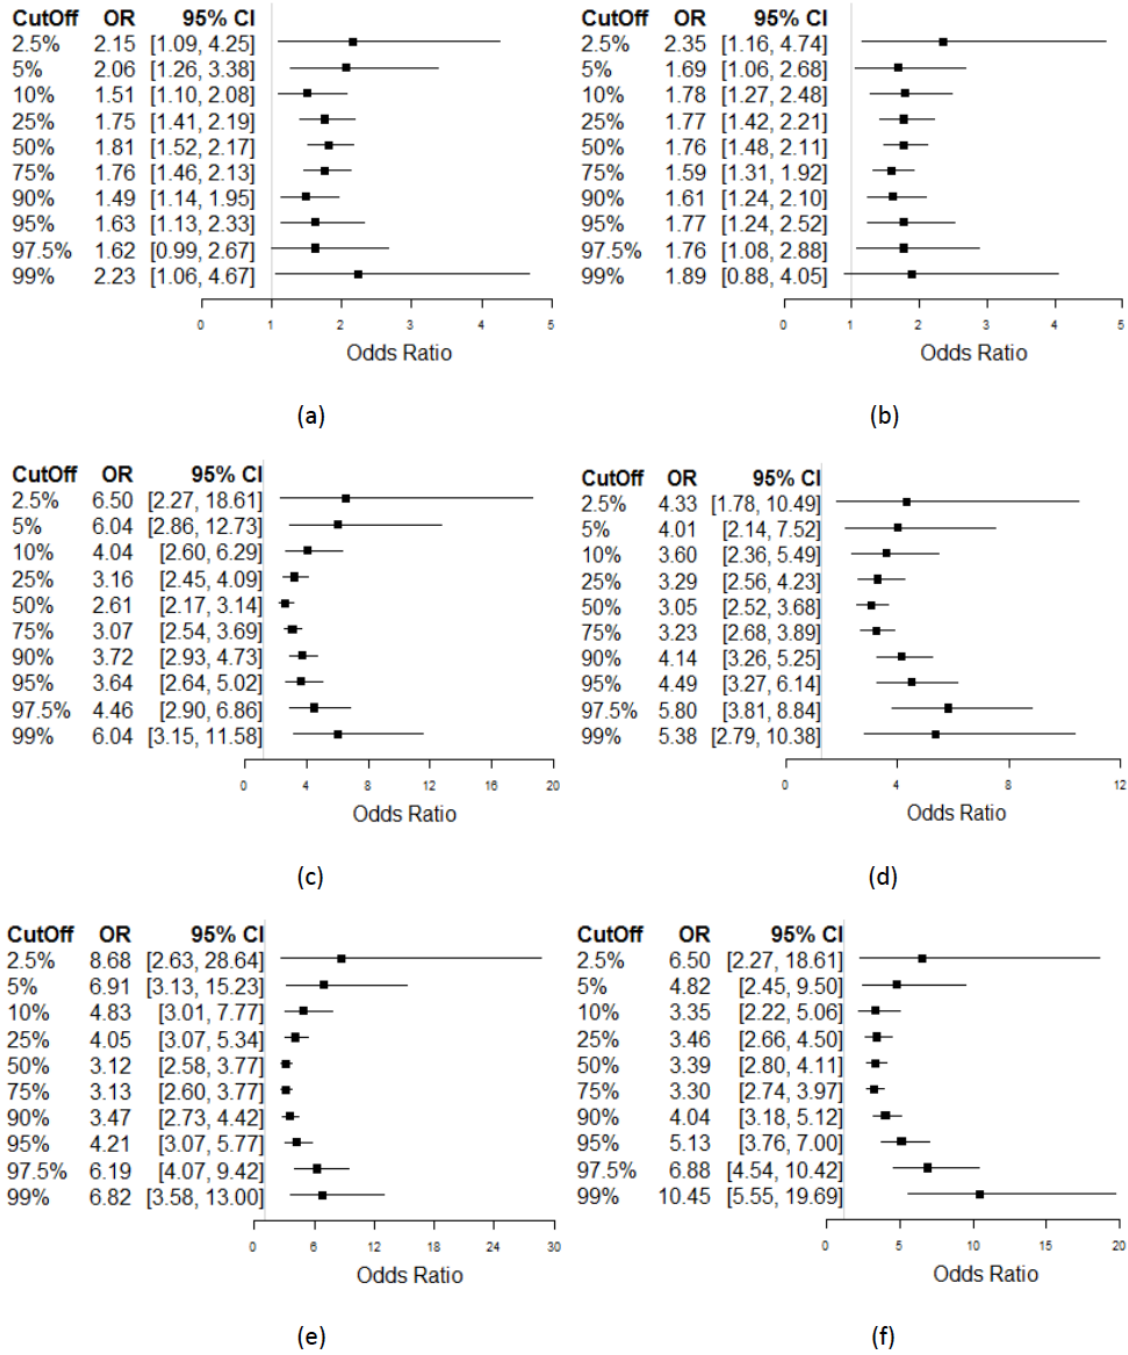

Supplementary Table 1. List of 40 established variants included in aggregate risk-allele testing. Individual association results for these variants with early-onset PCa can be found in Lange et al. (21)

| Locus | Variant<br>(Rare/Common <sup>#</sup> ) | Imputation<br>Quality<br>(R <sup>2</sup> ) |
|-------|----------------------------------------|--------------------------------------------|
| 2p11  | rs10187424 (G/A)                       | 1.00                                       |
| 2p15  | rs721048 (A/G)                         | 1.00                                       |
| 2p21  | rs1465618 (A/G)                        | 0.94                                       |
| 2q31  | rs12621278 (G/A)                       | 1.00                                       |
| 2q37  | rs2292884 (G/A)                        | 1.00                                       |
| 3p12  | rs2660753 (T/C)                        | 0.99                                       |
| 3q21  | rs10934853 (A/C)                       | 1.00                                       |
| 3q23  | rs6763931 (T/C)                        | 1.00                                       |
| 3q26  | rs10936632 (C/A)                       | 0.75                                       |
| 4q22  | rs17021918 (T/C)                       | 0.99                                       |
| 4q22  | rs12500426 (A/C)                       | 0.99                                       |
| 4q24  | rs7679673 (A/C)                        | 0.98                                       |
| 5p12  | rs2121875 (G/T)                        | 1.00                                       |
| 5p15  | rs2242652 (A/G)                        | 0.49                                       |
| 6p21  | rs130067 (G/T)                         | 1.00                                       |
| 6q25  | rs9364554 (T/C)                        | 1.00                                       |
| 7p15  | rs10486567 (A/G)                       | 1.00                                       |
| 7q21  | rs6465657 (C/T)                        | 1.00                                       |
| 8p21  | rs2928679 (T/C)                        | 1.00                                       |
| 8p21  | rs1512268 (A/G)                        | 1.00                                       |
| 8q24  | rs1447295 (A/C)                        | 1.00                                       |
| 8q24  | rs6983267 (G/T)                        | 1.00                                       |
| 8q24  | rs16901979 (A/C)                       | 1.00                                       |
| 8q24  | rs10086908 (T/C)                       | 1.00                                       |
| 8q24  | rs12543663 (C/A)                       | 1.00                                       |
| 8q24  | rs620861 (A/G)                         | 0.97                                       |
| 9q33  | rs1571801 (T/G)                        | 0.99                                       |
| 10q11 | rs10993994 (T/C)                       | 0.99                                       |
| 10q26 | rs4962416 (C/T)                        | 1.00                                       |
| 11p15 | rs7127900 (A/G)                        | 1.00                                       |
| 11q13 | rs7931342 (T/G)                        | 1.00                                       |
| 12q13 | rs10875943 (C/T)                       | 1.00                                       |
| 12q13 | rs902774 (A/G)                         | 1.00                                       |
| 17q12 | rs4430796 (A/G)                        | 0.75                                       |
| 17q12 | rs11649743 (A/G)                       | 1.00                                       |
| 17q24 | rs1859962 (G/T)                        | 1.00                                       |
| 19q13 | rs2735839 (A/G)                        | 1.00                                       |
| 22q13 | rs5759167 (T/G)                        | 1.00                                       |
| Xp11  | rs5945619 (G/A)                        | 0.72                                       |
| Xq12  | rs5919432 (G/A)                        | 1.00                                       |
